# Supplementary material for: Catalytic pulsed plasma treatment for organic micropollutants: unveiling the synergistic role of photocatalysts in radical generation and degradation mechanisms
Source: Royal Society of Chemistry journal article supplement (doi:10.1039/d4ew00167b), 2024-01-01
Supplement: d4ew00167b1.pdf [file d4ew00167b1.pdf]

## Electronic Supplementary Information

### **Catalytic Pulse Plasma Treatment for Organic Micropollutants: Unveiling the Synergistic Role of Photocatalysts in Radical Generation and Degradation Mechanisms**

Ritik Anand and Ligy Philip\*

Environmental Engineering Division, Department of Civil Engineering, IIT Madras, Chennai  
600036, India

\*Corresponding author: Dr. Ligy Philip

Department of Civil Engineering,  
Indian Institute of Technology Madras,  
Chennai 600 036, India

Phone: 91-44-22574274

E-mail: [ligy@iitm.ac.in](mailto:ligy@iitm.ac.in)

## 2. Materials and Methods

### 2.7. Effect of wastewater system parameters

#### *Total Alkalinity*

The total alkalinity of the sample was analyzed using the titrimetric method. 20 mL of sample was titrated against 0.02 N H<sub>2</sub>SO<sub>4</sub> using phenolphthalein and methyl orange indicators. The total alkalinity was calculated using Eq. S1 [1].

$$\text{Total alkalinity (mg/L as CaCO}_3\text{)} = \frac{\text{Volume of titrant (H}_2\text{SO}_4\text{)used} * 0.02 \text{ N} * 50000}{\text{Volume of sample}}$$

(S1)

#### *Total Hardness*

To measure the total hardness of wastewater, one or two drops of ammonia buffer was added to the 20 mL sample to increase the pH to around 10.0. The sample was titrated against 0.01 N EDTA using Eriochrome Black-T as indicator. At the end point, the solution turned from wine red to blue. The hardness was calculated using Eq. S2 [2].

$$\text{Total hardness (mg/L as CaCO}_3\text{)} = \frac{\text{Volume of titrant (EDTA) (mL)} * \text{Normality of EDTA} * 50000}{\text{Volume of sample (mL)}}$$

(S2)

#### *Humic Acid*

Humic acid was measured using UV Spectrophotometer (Shimadzu, Japan) by calibrating the known concentration against absorbance at 254 nm [3].

### Cost Details

#### A. Catalyst

As per the latest sources local to our region following are the costs of the catalyst.

Cost of lab-grade TiO<sub>2</sub> = USD 480/kg

Cost of commercial TiO<sub>2</sub> (85:15 Anatase: Rutile) costs around USD3/ kg.

Cost of N-TiO<sub>2</sub>(lab synthesis as per the methodology <sup>14</sup>) USD 12080/kg

| S. No.                                                           | Chemicals                              | Amount used during preparation | Expenses on the preparation (\$) # |
|------------------------------------------------------------------|----------------------------------------|--------------------------------|------------------------------------|
| a) Estimated preparation cost for N-TiO <sub>2</sub> (for 0.5 g) |                                        |                                |                                    |
| 1                                                                | Titanium Isopropoxide                  | 2.4 mL                         | 3                                  |
| 2                                                                | Ethanol                                | 60 mL                          | 1                                  |
| 3                                                                | Urea                                   | 0.8 g                          | 0.12                               |
| 4                                                                | HCl                                    | 2.5 mL                         | 0.02                               |
| 5                                                                | Energy costs (Vacuum Oven, Centrifuge) | 19 kWh                         | 1.9                                |
| Total =                                                          |                                        |                                | 6.04                               |
| Per g =                                                          |                                        |                                | 12.08                              |

# Cost based on prices from Sigma Aldrich website

## B. Operational Cost

### Batch Plasma Reactor

#### Step 1: Calculation of total amortized capital cost

Total amortized capital cost = capital cost + amortized cost

Cost analysis was carried out based on annual amortized cost, maintenance cost, and operating cost.

For the batch reactor, the total capital cost, including electrodes, casing, fittings, and engineering cost

(i) Electrodes cost = 62.5 \$

(ii) Casing, fittings, piping and engineering cost for 4 cm height x 5 cm Dia of 50 mL size reactor as per manufacturing pricing = 25 \$ (as per manufacturing pricing) (excluding electrode cost)

Therefore, the total capital cost = (i) + (ii) = 62.5 \$ + 25 \$ = 87.5 \$

$$\text{Amortized cost} = A = \frac{p * i * (1 + i)^{n-1}}{(1 + i)^n - 1}$$

The investment cost 'p' for batch reactor in original year is 87.5 \$ that including the cost of energy, material (electrodes, Plexiglas), chemicals casing, fitting, piping and engineering. The reactor life was considered for 10 years with an annual depreciation rate of 10%. (10 years because generally electrical-based items are considered for 10 years of life)

Therefore, the calculated amortized annual capital cost  $A = 13$  \$

### **Step 2: Maintenance cost**

In the present reactor, tungsten electrodes were used, which need annual replacements. The electrode replacement cost is considered to be 5000 INR

Therefore, maintenance cost = 62.5 \$ (as per manufacturing pricing)

### **Step 3: Annual operating cost**

It was considered that the reactor operated for 8 hours daily with a treatment time of 15 min per batch.

Pulsed power plasma cost: Given input energy at 23 kV, 33 Hz frequency, and corresponding deposited energy is 0.01 kW for batch reactor

Therefore, the total annual electricity requirement is = 29.2 kWh, which corresponds to 2.92 \$

Therefore, annual operating cost = 2.9 \$/year

### **Step 4: Total treatment cost**

Total annual treatment cost = annual amortized cost + maintenance cost + operating cost = 13 \$ + 62.5 \$ + 2.9 \$ = 78.4 \$/year

The total volume of wastewater treated = 584 L

Total water treatment cost/m<sup>3</sup> = 134 \$/m<sup>3</sup>

### ***List of Figures***

**Figure S1** Experimental setup and pulse plasma discharge circuit

**Figure S2** Kinetics of accumulated (a)  $\bullet\text{OH}$  (b)  $\text{H}_2\text{O}_2$  (c)  $\bullet\text{SO}_4^-$  (Applied voltage = 23 kV, frequency = 33 Hz)

**Figure S3** Toxicity Assay for NPX, TCS, and RR180 (a) without catalyst (b) with N-TiO<sub>2</sub> for various time intervals

**Figure S4** Residual toxicity for secondary treated effluent (a) spiked untreated sample (b) plasma treated sample

**Figure S5.** Mass spectra of naproxen (NPX) solution and those treated by standalone plasma discharge after different treatment times (a) initial NPX solution (b) treated after 2 min (c) 4 min (d) 6 min (e) 8 min.

**Figure S6.** Mass spectra of naproxen (NPX) solution and those treated by catalytic plasma discharge with N-TiO<sub>2</sub> after different treatment times (a) treated after 2 min (b) 4 min (c) 6 min (d) 8 min.

**Figure S7.** Mass spectra of triclosan (TCS) solution and those treated by standalone plasma discharge after different treatment times (a) initial TCS solution (b) treated after 2 min (c) 4 min (d) 6 min (e) 8 min.

**Figure S8.** Mass spectra of triclosan (TCS) solution and those treated by catalytic plasma discharge with N-TiO<sub>2</sub> after different treatment times (a) treated after 2 min (b) 4 min (c) 6 min (d) 8 min.

**Figure S9.** Mass spectra of reactive red 180 (RR180) solution and those treated by standalone plasma discharge after different treatment times (a) treated after 2 min (b) 4 min (c) 6 min (d) 8 min (e) 12 min.

**Figure S10.** Mass spectra of reactive red 180 (RR180) solution and those treated by catalytic plasma discharge with N-TiO<sub>2</sub> after different treatment times (a) treated after 2 min (b) 4 min (c) 6 min (d) 8 min.

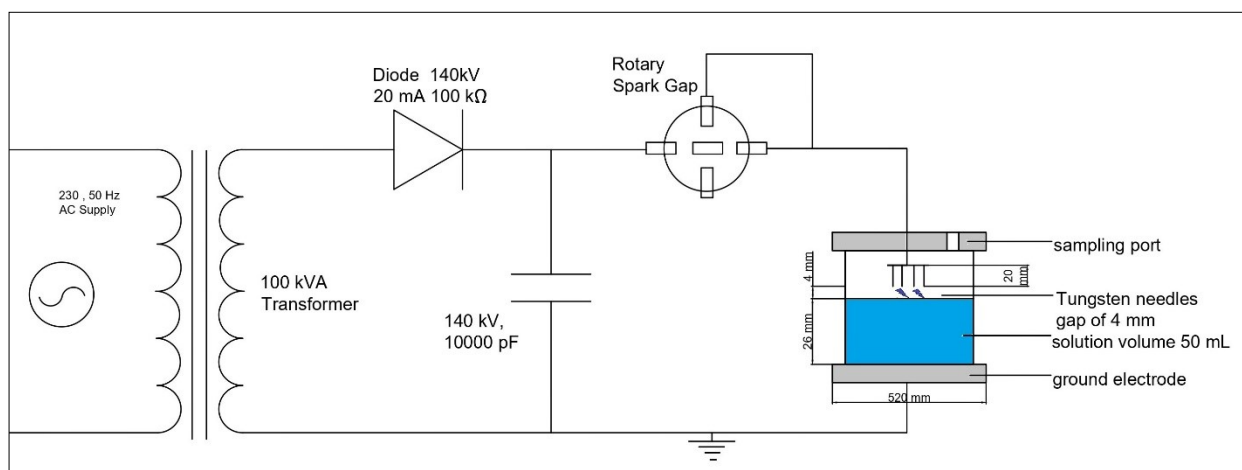

**Fig. S1.** Experimental setup and pulse plasma discharge circuit

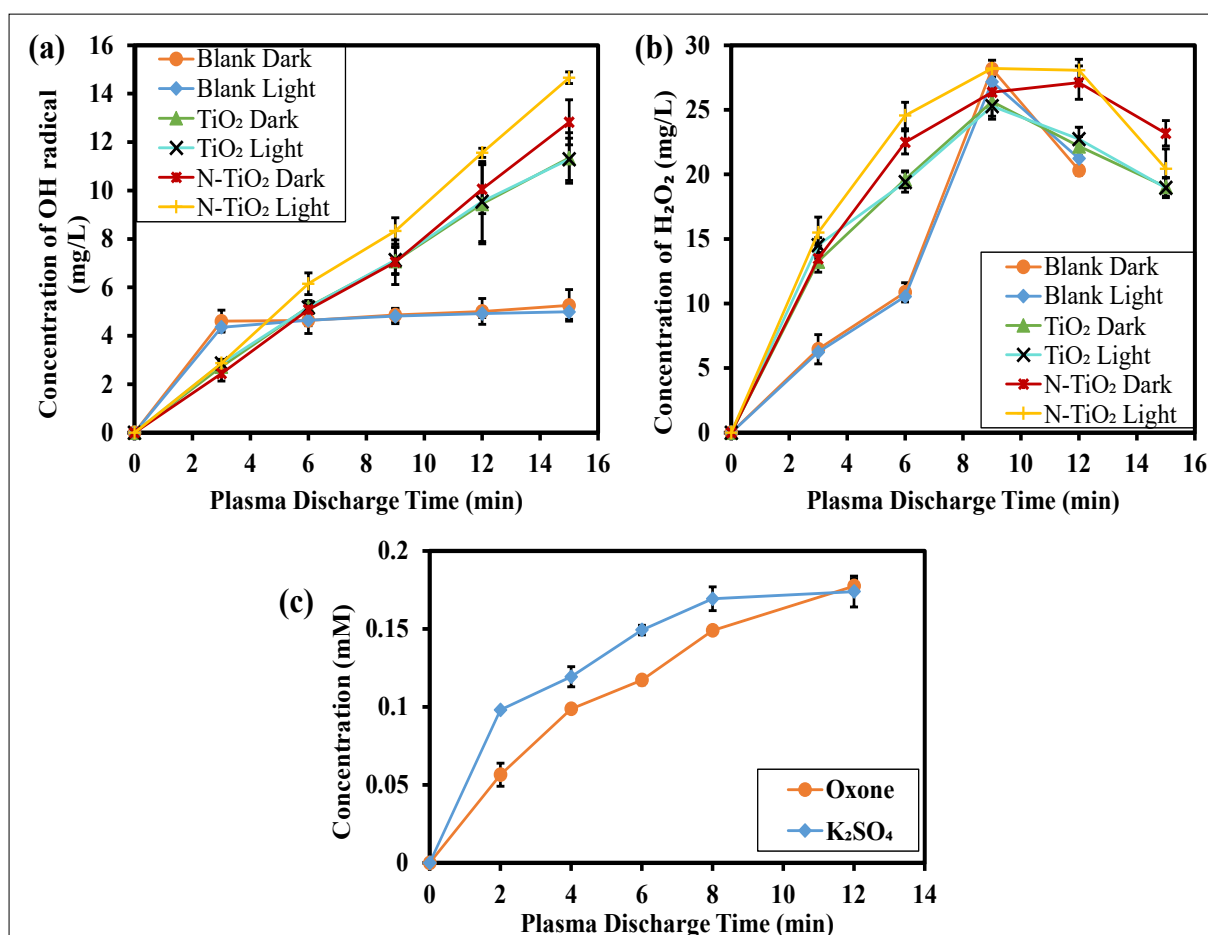

**Fig. S2.** Kinetics of accumulated (a)  $\cdot\text{OH}$  (b)  $\text{H}_2\text{O}_2$  (c)  $\cdot\text{SO}_4^-$  (Applied voltage = 23 kV, frequency = 33 Hz)

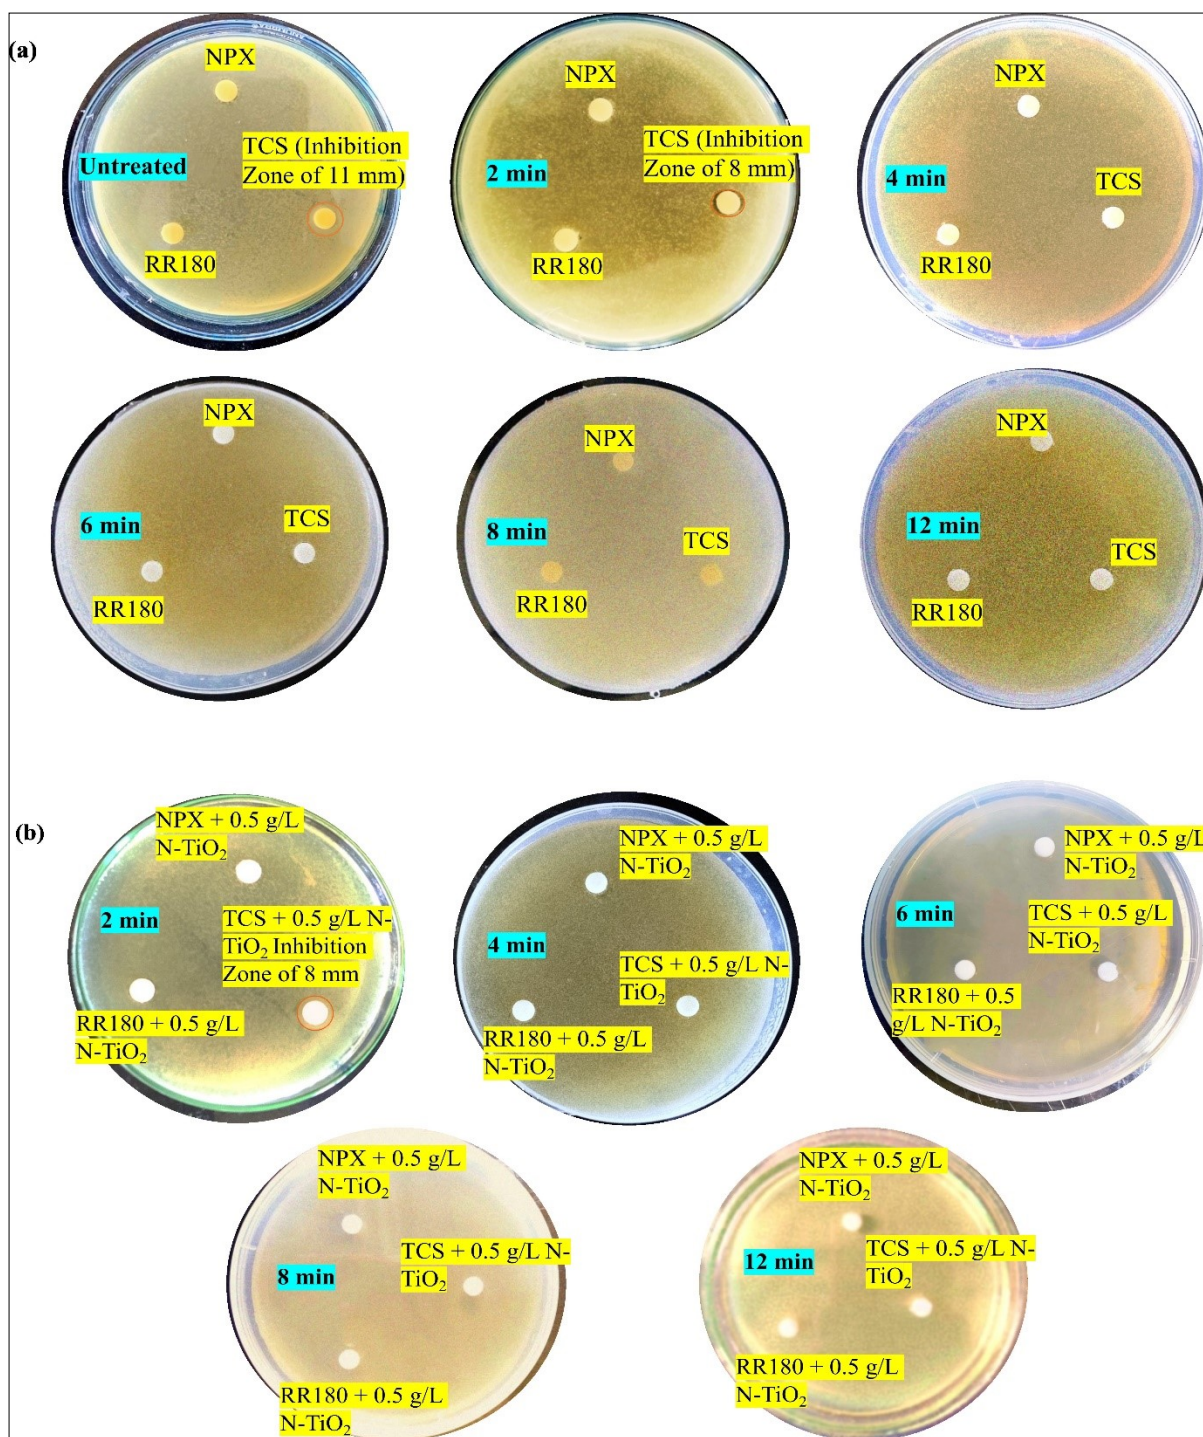

**Fig. S3.** Toxicity Assay for NPX, TCS, and RR180 (a) without catalyst (b) with N-TiO<sub>2</sub> for various time intervals

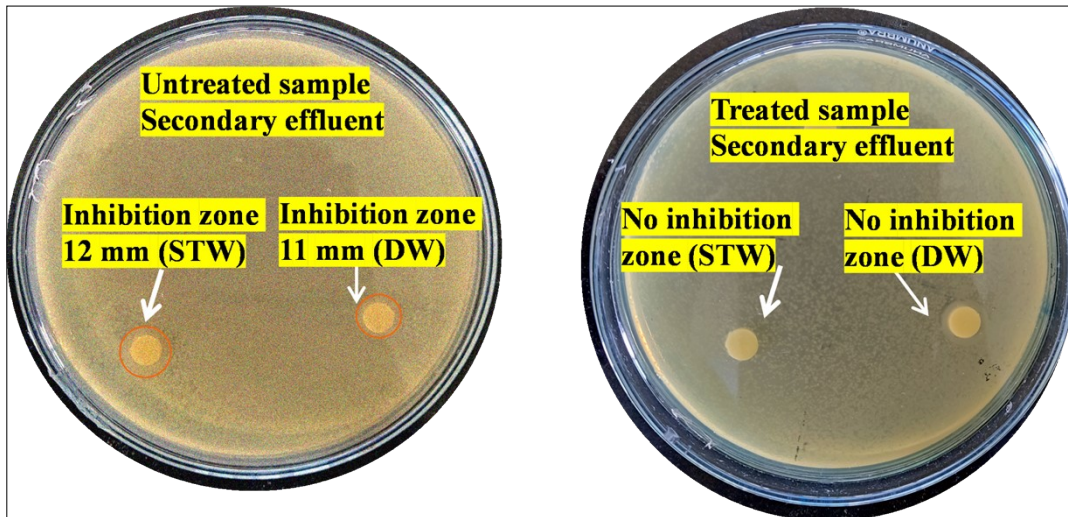

**Fig. S4.** Residual toxicity for secondary treated effluent (a) spiked untreated sample (b) plasma treated sample



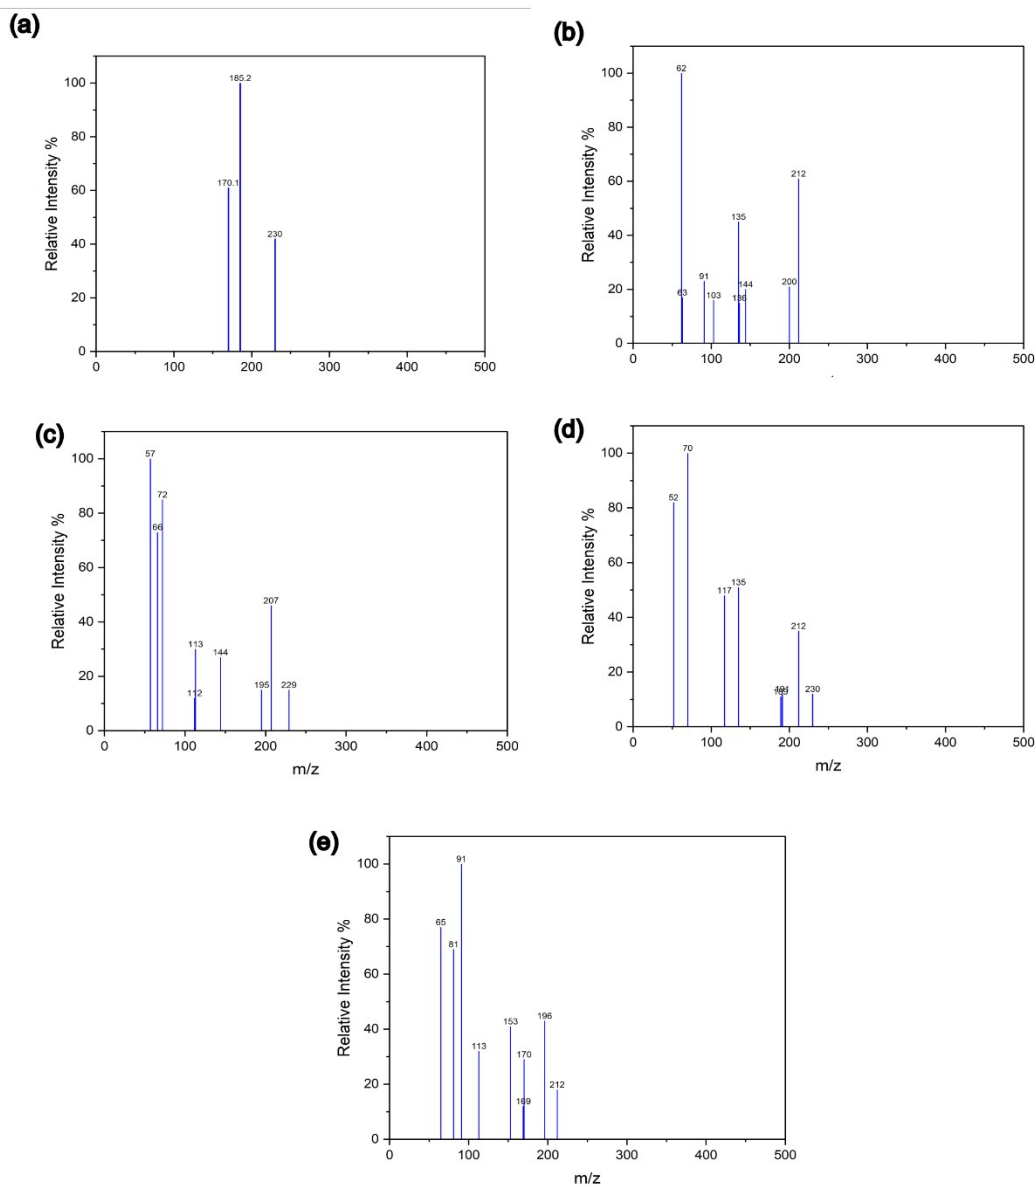

**Fig.S5.** Mass spectra of naproxen (NPX) solution and those treated by standalone plasma discharge after different treatment times (a) initial NPX solution (b) treated after 2 min (c) 4 min (d) 6 min (e) 8 min.

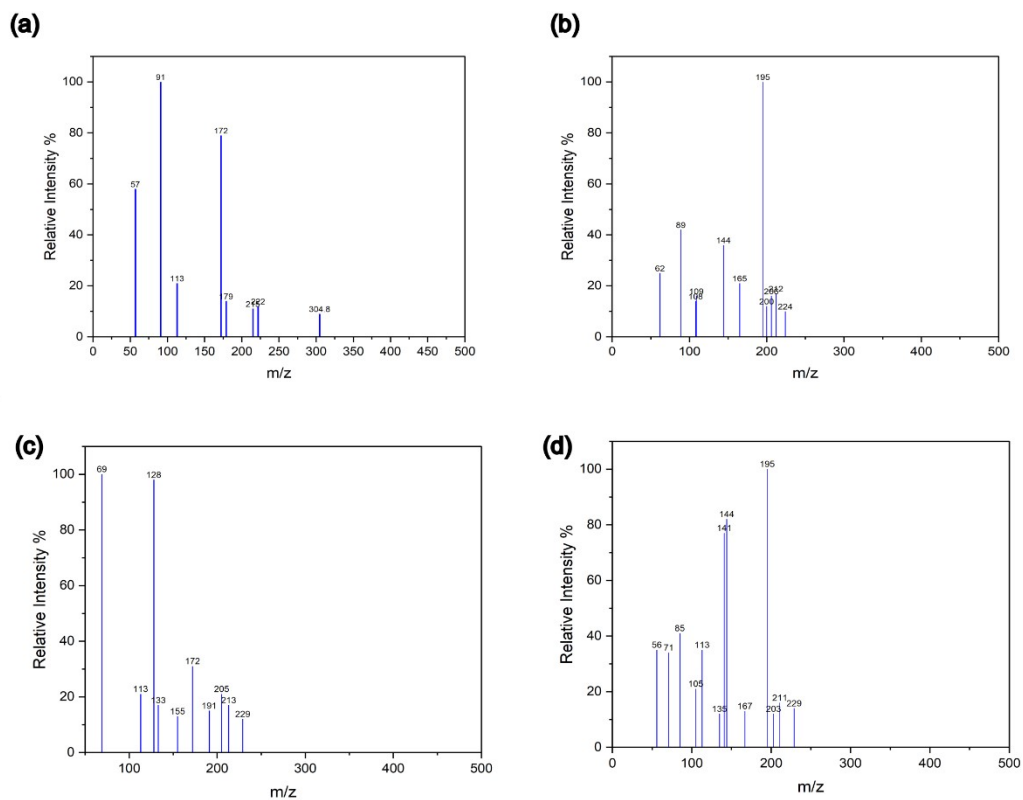

**Fig. S6.** Mass spectra of naproxen (NPX) solution and those treated by catalytic plasma discharge with N-TiO<sub>2</sub> after different treatment times (a) treated after 2 min (b) 4 min (c) 6 min (d) 8 min.

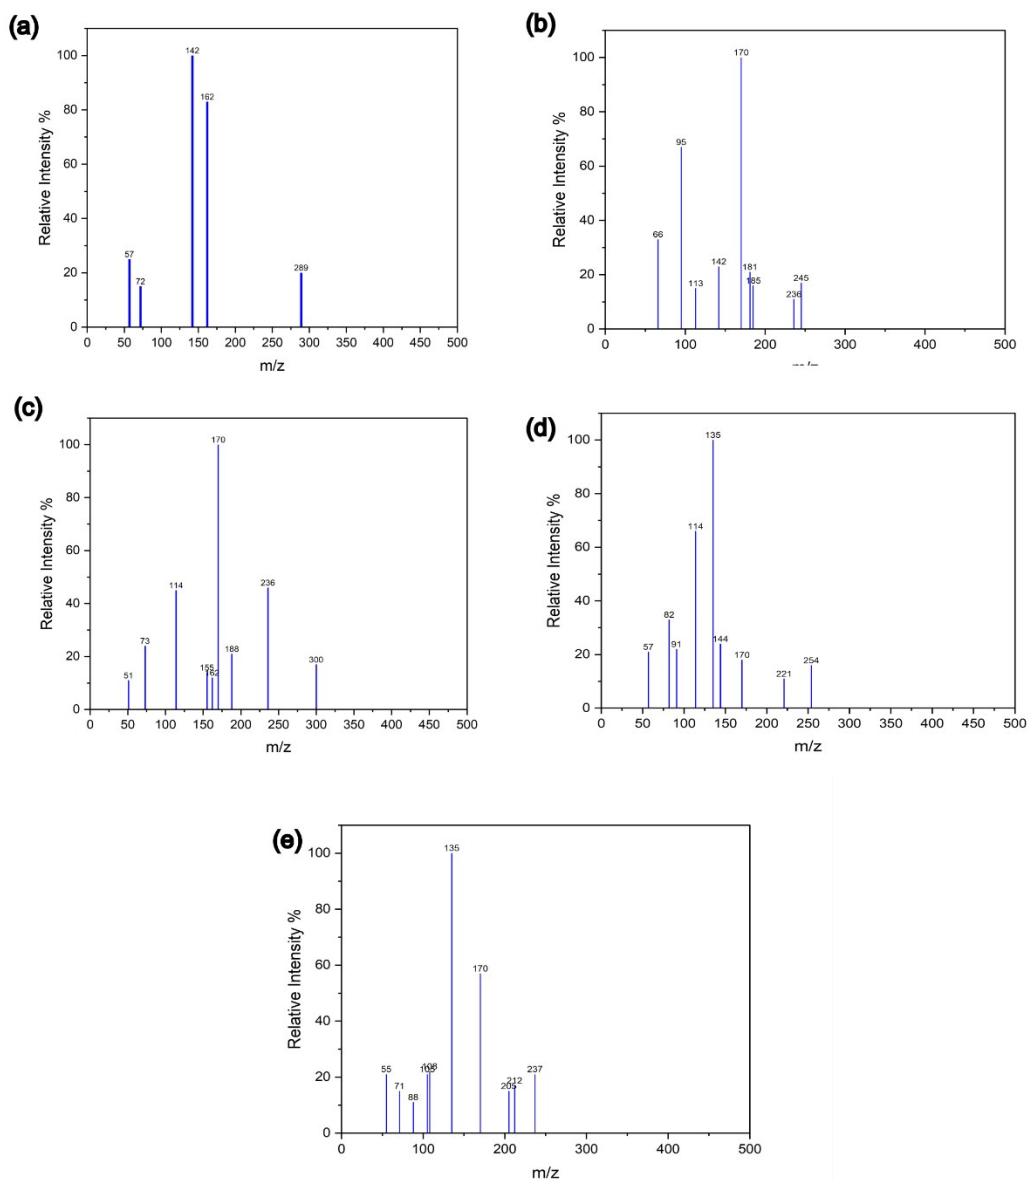

**Fig. S7.** Mass spectra of triclosan (TCS) solution and those treated by standalone plasma discharge after different treatment times (a) initial TCS solution (b) treated after 2 min (c) 4 min (d) 6 min (e) 8 min.

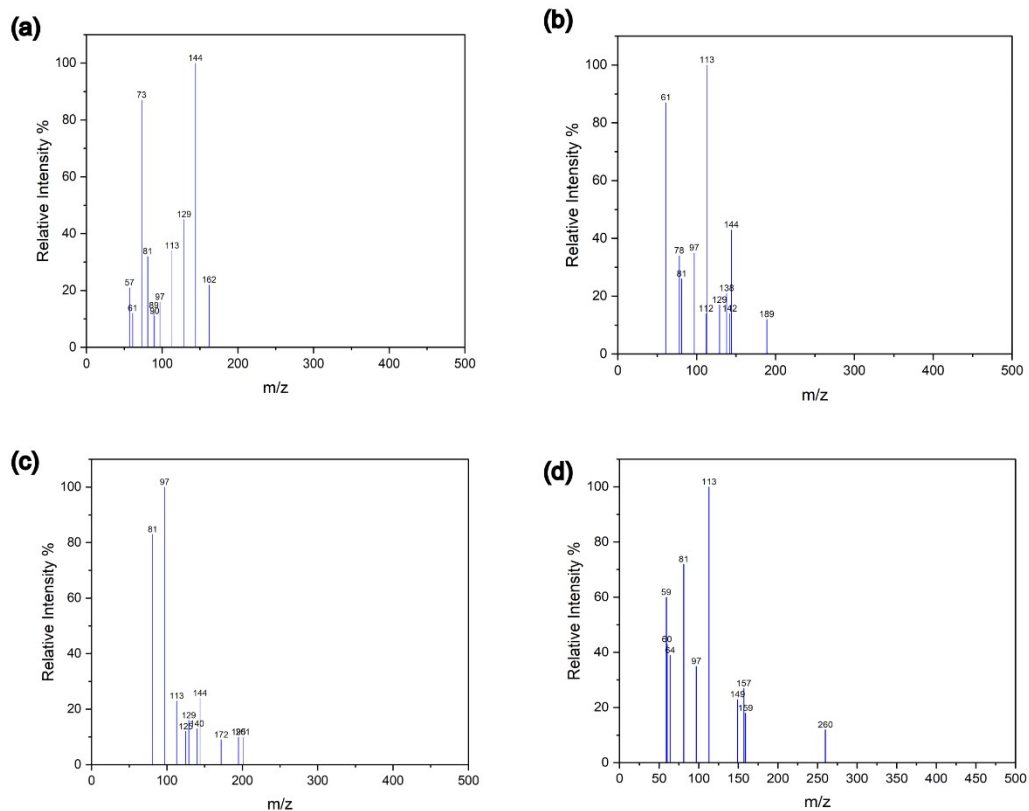

**Fig. S8.** Mass spectra of triclosan (TCS) solution and those treated by catalytic plasma discharge with N-TiO<sub>2</sub> after different treatment times (a) treated after 2 min (b) 4 min (c) 6 min (d) 8 min.

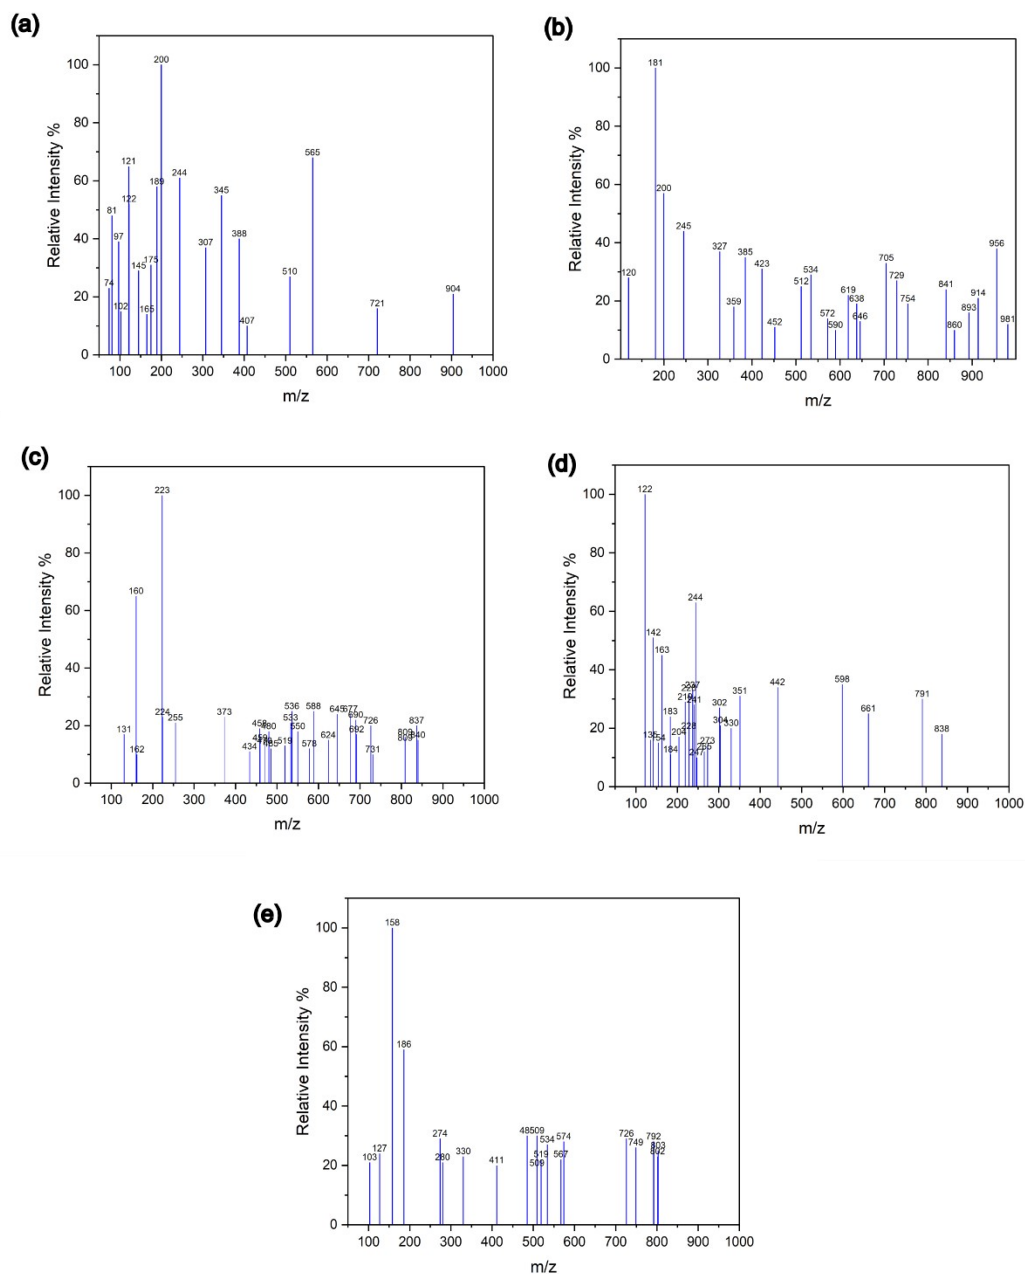

**Fig. S9.** Mass spectra of reactive red 180 (RR180) solution and those treated by standalone plasma discharge after different treatment times (a) treated after 2 min (b) 4 min (c) 6 min (d) 8 min (e) 12 min.

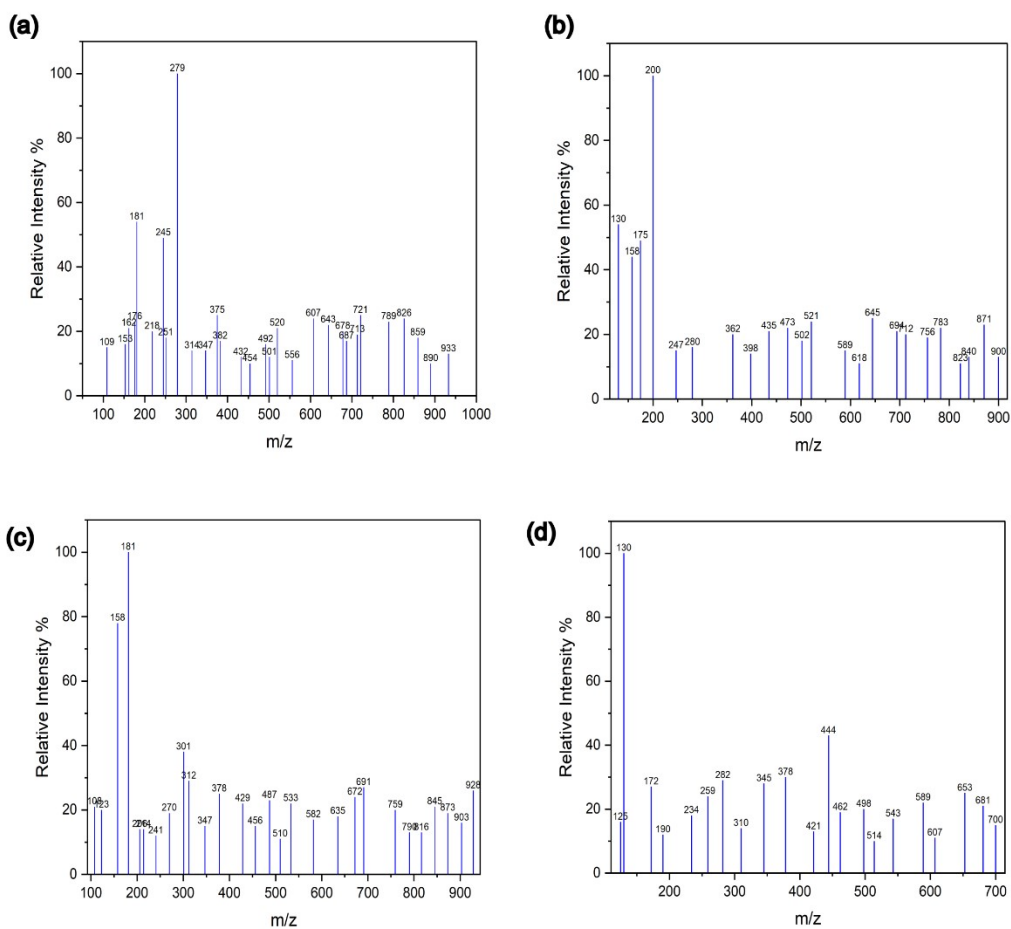

**Fig. S10.** Mass spectra of reactive red 180 (RR180) solution and those treated by catalytic plasma discharge with N-TiO<sub>2</sub> after different treatment times (a) treated after 2 min (b) 4 min (c) 6 min (d) 8 min.

### ***List of Tables***

**Table S1** Physico-chemical properties of the pollutants in the study

**Table S2** LC-MS analysis conditions for analysis of naproxen, triclosan and reactive red 180

**Table S3** Anion balance for pollutant degradation with plasma coupled with N-TiO<sub>2</sub> (a) Cl<sup>-</sup> balance for triclosan (TCS) degradation (Initial conc. = 10 mg/L) and (b) SO<sub>4</sub><sup>2-</sup> balance for reactive red 180 (RR180) degradation (Initial conc. = 20 mg/L)

**Table S1.** Physico-chemical properties of the pollutants in the study

|                     | <b>Reactive Red 180 (RR180)</b>                                                   | <b>Naproxen (NPX)</b>                                                              | <b>Triclosan (TCS)</b>                                                              |
|---------------------|-----------------------------------------------------------------------------------|------------------------------------------------------------------------------------|-------------------------------------------------------------------------------------|
|                     | 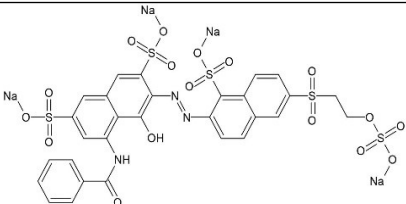 |  |  |
| Mol. Formula        | $C_{29}H_{19}N_3Na_4O_{17}S_5$                                                    | $C_{14}H_{14}O_3$                                                                  | $C_{12}H_7Cl_3O_2$                                                                  |
| Mol. Wt.            | 937.79                                                                            | 230.26                                                                             | 289.5                                                                               |
| Half-life in water  | Not Available                                                                     | 12 – 17 hours                                                                      | 8 hours                                                                             |
| Toxicity            | Not Available                                                                     | Rat- LD <sub>50</sub> = 500 mg/kg                                                  | Rat- LD <sub>50</sub> =3700 mg/kg                                                   |
| log K <sub>ow</sub> | -                                                                                 | 3.18                                                                               | 4.8                                                                                 |

**Table S2.** LC-MS analysis condition for analysis of naproxen, triclosan and reactive red 180.

| <b>Pollutant</b> | <b>Mobile Phase</b>                     | <b>Flow Rate</b> | <b>Capillary Voltage</b> | <b>Run time</b> |
|------------------|-----------------------------------------|------------------|--------------------------|-----------------|
| Naproxen         | Acetonitrile: 0.5 % Acetic Acid = 60:40 | 0.3 mL/min       | 3700 V                   | 30 min          |
| Triclosan        | Acetonitrile: 1.0 % Formic Acid = 80:20 | 0.5 mL/min       | 4000 V                   | 30 min          |
| Reactive Red 180 | Acetonitrile: water = 80:20             | 0.3 mL/min       | 4000 V                   | 30 min          |



**Table S3** Anion balance for pollutant degradation with plasma coupled with N-TiO<sub>2</sub> (a) Cl<sup>-</sup> balance for triclosan (TCS) degradation (Initial conc. = 10 mg/L) and (b) SO<sub>4</sub><sup>2-</sup> balance for reactive red 180 (RR180) degradation (Initial conc. = 20 mg/L)

| <b>(a) TCS</b>                     |                           |                         |                                          |                                       |  |
|------------------------------------|---------------------------|-------------------------|------------------------------------------|---------------------------------------|--|
| <b>Plasma Discharge Time (min)</b> | <b>Avg. % Degradation</b> | <b>% Mineralization</b> | <b>Theoretical Cl<sup>-</sup> (mg/L)</b> | <b>Observed Cl<sup>-</sup> (mg/L)</b> |  |
| 0                                  | 0                         | 0                       | 0                                        | 0                                     |  |
| 1                                  | 91.48                     | 21.60                   | 0.79                                     | 0.74                                  |  |
| 2                                  | 94.76                     | 30.60                   | 1.12                                     | 1.12                                  |  |
| 4                                  | 96.41                     | 48.92                   | 1.80                                     | 1.78                                  |  |
| 6                                  | 99.60                     | 79.59                   | 2.81                                     | 2.88                                  |  |

  

| <b>(b) RR180</b>                   |                           |                         |                                                       |                                                    |                 |
|------------------------------------|---------------------------|-------------------------|-------------------------------------------------------|----------------------------------------------------|-----------------|
| <b>Plasma Discharge Time (min)</b> | <b>Avg. % Degradation</b> | <b>% Mineralization</b> | <b>Theoretical SO<sub>4</sub><sup>2-</sup> (mg/L)</b> | <b>Observed SO<sub>4</sub><sup>2-</sup> (mg/L)</b> |                 |
|                                    |                           |                         |                                                       | <b>Liquid</b>                                      | <b>Catalyst</b> |
| 0                                  | 0                         | 0                       | 0                                                     | 0                                                  | 0               |
| 2                                  | 37.15                     | 16.09                   | 0.54                                                  | 0.17                                               | 0.30            |
| 4                                  | 48.51                     | 31.15                   | 1.06                                                  | 0.58                                               | 0.43            |
| 8                                  | 74.14                     | 48.38                   | 1.64                                                  | 0.88                                               | 0.67            |
| 12                                 | 80.30                     | 65.82                   | 2.23                                                  | 1.28                                               | 0.85            |

## References

- [1] APHA, ed., 2320 ALKALINITY, in: Stand. Methods Exam. Water Wastewater, 22nd ed., American Public Health Association, Washington DC, 2017. <https://doi.org/doi:10.2105/SMWW.2882.023>.
- [2] 2340 HARDNESS, in: Stand. Methods Exam. Water Wastewater, American Public Health Association, 2017. <https://doi.org/doi:10.2105/SMWW.2882.025>.
- [3] A. Rodrigues, A. Brito, P. Janknecht, M.F. Proena, R. Nogueira, Quantification of humic acids in surface water : effects of divalent cations , pH, and filtration, J. Environ. Monit. 11 (2009) 377–382. <https://doi.org/10.1039/B811942B>.
